1 Single-cell radioluminescence microscopy with two-fold higher sensitivity using dual scintillator  
2 configuration

3

4 Tae Jin Kim<sup>1</sup>, Qian Wang<sup>2</sup>, Mark Shelor<sup>3</sup>, and Guillem Pratz<sup>1</sup>

5 **<sup>1</sup> Department of Radiation Oncology, Stanford School of Medicine, Stanford, California,**

6 **USA**

7 **<sup>2</sup> Department of Bioengineering, University of California, Davis, California, USA**

8 **<sup>3</sup> Department of Biomedical Engineering, University of California, Merced, California, USA**

9

## 10 Abstract

11 Radioluminescence microscopy (RLM) is an imaging technique that allows quantitative analysis  
12 of clinical radiolabeled drugs and probes in single cells. However, the modality suffers from  
13 slow data acquisition (10 – 15 minutes), thus critically affecting experiments with short-lived  
14 radioactive drugs. To overcome this issue, we suggest an approach that significantly accelerates  
15 data collection. Instead of using a single scintillator to image the decay of radioactive molecules,  
16 we sandwiched the radiolabeled cells between two scintillators. As proof of concept, we imaged  
17 cells labeled with [<sup>18</sup>F]FDG, a radioactive glucose popularly used in oncology to image tumors.  
18 Results show that the double scintillator configuration increases the microscope sensitivity by  
19 two-fold, thus reducing the image acquisition time by half to achieve the same result as the  
20 single scintillator approach. The experimental results were also compared with Geant4 Monte  
21 Carlo simulation to confirm the two-fold increase in sensitivity with only minor degradation in

22 spatial resolution. Overall, these findings suggest that the double scintillator configuration can be  
23 used to perform time-sensitive studies such as cell pharmacokinetics or cell uptake of short-lived  
24 radiotracers.

25

## 26 Introduction

27 Positron emission tomography (PET) is a molecular imaging technique that enables interrogation  
28 of biophysical processes in living subjects in a non-invasive manner. It is popularly used in the  
29 clinic to diagnose and characterize various diseases such as cancer, cardiovascular disorders, and  
30 neurological disorders using a wide range of radiotracers [1–4], including radioactive glucose 2-  
31 deoxy-2-[<sup>18</sup>F]fluorodeoxyglucose or [<sup>18</sup>F]FDG. [<sup>18</sup>F]FDG is widely used in the clinic for  
32 detecting and staging cancer [5–8].

33 Due to their clinical significance, novel radiopharmaceuticals are actively investigated for  
34 diagnostic and therapeutic purposes. However, the biological activity of radiopharmaceuticals is  
35 difficult to confirm—the spatial resolution of current clinical and pre-clinical imaging systems is  
36 limited to the tissue level. This makes it difficult to acquire detailed information of how these  
37 radioactive molecules interact with target cells that present heterogeneous molecular  
38 characteristics. Techniques that enable single-cell radionuclide detection (e.g., micro-  
39 autoradiography [9,10]) are challenging to implement and not applicable to live cells, and are  
40 thus rarely used.

41 Radioluminescence microscopy (RLM) was introduced to enable *in vitro* radionuclide imaging  
42 of live single cells. In RLM, a scintillator crystal is placed directly under or above the  
43 radiolabeled cells to observe optical flashes resulting from the decay of single radioactive

44 molecules. By capturing a series of image frames and individually counting the scintillation  
45 flashes within each frame, RLM can quantify how many radioactive molecules are present within  
46 individual cell with high sensitivity – down to fewer than 1,000 molecules per cell. The unique  
47 capabilities of RLM have revealed previously unattainable information on single-cell response to  
48 clinical radiotracers [11–13]. However, one limitation of this modality is the relatively long  
49 image acquisition time, which ranges from 15 to 30 minutes per sample.

50 In this study, we introduce a simple method to significantly reduce image acquisition time.  
51 Compared to the original approach, which uses a single scintillator to capture radioluminescence  
52 signals, we sandwich the radiolabeled cells between two scintillators. This allows complete  
53 geometric coverage for increased detection efficiency. As proof-of-concept, human breast cancer  
54 cells (MDA-MB-231) grown on a cadmium tungstate ( $\text{CdWO}_4$ ) scintillator are incubated with  
55 [ $^{18}\text{F}$ ]FDG and imaged with both single and dual scintillator configurations. The experimental  
56 results are further compared with Monte Carlo simulations to demonstrate that the detection  
57 sensitivity of RLM doubles when using two scintillators.

58

## 59 Materials and methods

### 60 Sample preparation

#### 61 Cell culture

62 A cadmium tungstate scintillator ( $\text{CdWO}_4$ , MTI Co.) with a dimension of  $10 \times 10 \times 0.5$  mm  
63 (width  $\times$  length  $\times$  height) was coated with 100  $\mu\text{l}$  of fibronectin (5  $\mu\text{g}/\text{ml}$ ) to promote cell  
64 adhesion to the crystal surface. The scintillators were incubated for  $\sim 2$  hours and washed three  
65 times with sterile distilled water. The treated scintillator was placed on a 35 mm diameter cover-

66 slip bottom dish ( $\mu$ -Dish, ibidi GmbH), and MDA-MB-231 human breast cancer cells suspended  
67 in DMEM were dispensed in the dish with cell density of  $10^4$  cells/ml. The cells were then  
68 incubated in a CO<sub>2</sub> incubator for 24 h prior to the experiment to allow them to attach to the  
69 scintillator surface.

70

## 71 Radiolabeling cells

72 The MDA-MB-231 cells were labeled with radioactive glucose analogue [<sup>18</sup>F]FDG, a radiotracer  
73 that is commonly used in the clinic to detect and stage cancer in patients. The cells were first  
74 incubated in glucose-free DMEM for 30 – 40 minutes. The culture media was then replaced with  
75 a solution of glucose-free DMEM containing 22 – 24 KBq/ml of [<sup>18</sup>F]FDG, and the cells were  
76 incubated for an additional 45 minutes. After the radiolabeling process, the cells were washed  
77 with clear glucose-free DMEM.

78

## 79 Radionuclide imaging

80 Radioluminescence imaging was performed with a low-light microscope developed in-house  
81 [14]. The microscope consists of a 20× / 0.75 NA microscope objective lens (Nikon, CFI Plan  
82 Apo Lambda) coupled to a 36 mm tube lens. This yields an effective magnification of 3.6× while  
83 maintaining the native numerical aperture of the objective lens [15]. The microscope is mounted  
84 on top of a highly sensitive EMCCD camera (C9100-13, Hamamatsu Co.). To protect the  
85 EMCCD camera from stray light and to minimize the background signal, the entire microscope  
86 was enclosed in a customized light-tight box.

87 The culture dish containing the scintillator with MDA-MB-231 cells was then placed on the  
88 microscope stage. A brightfield image was first captured with the camera settings set to standard  
89 mode (non-EMCCD mode). The first RLM image was then acquired (Figure 1a), with the  
90 camera parameters set to 1,060 EM gain,  $4 \times 4$  binning, 30 ms exposure time, and 10,000  
91 acquisition frames. After the first set of images, another scintillator was gently placed on top of  
92 the cells (Fig 1b). A second set of RLM images was captured with identical camera parameters.  
93 After both images were acquired, the culture dish was removed from the microscope stage and a  
94 separate dark reference sequence was captured (1,000 frames) for background subtraction.

95

96 **Fig 1. Schematic diagrams.** Radioluminescence microscopy with (a) single scintillator and (b)  
97 double scintillator configurations.

98

99 The radioactive decay signals were analyzed using the ORBIT toolbox (optical reconstruction of  
100 the beta-ionization track) [16]. In ORBIT, the reconstruction process starts by subtracting the  
101 background noise from each RLM image. Individual scintillation flashes are then isolated within  
102 each image frame and converted into  $(x, y)$  event coordinates. Once this process is repeated for  
103 the entire set of 10,000 images, the positions of all detected events are aggregated into a single  
104 image, where each pixel represents the number of radioactive decay events detected at that  
105 location. Detailed reconstruction procedures and radioluminescence imaging can also be found  
106 from our previous papers [14,16,17].

107

## 108 Monte Carlo Simulation

109 Experimental results were also compared by simulating the radioluminescence process using a  
110 Monte Carlo software package (Geant4), as described in our previous work [18,19]. A single  $^{18}\text{F}$   
111 point source with 1 Bq of radioactivity was generated in virtual space to represent a single  
112 radiolabeled cell. For the single scintillator experiment, the source was positioned 5  $\mu\text{m}$  above a  
113 100  $\mu\text{m}$ -thick  $\text{CdWO}_4$  slab. For the double scintillator configuration, a second  $\text{CdWO}_4$   
114 scintillator was placed 5  $\mu\text{m}$  above the source, i.e. with the  $^{18}\text{F}$  point source equidistant from the  
115 two scintillators. A total of 20,000 radioactive decay events were simulated, and the  
116 corresponding radioluminescence images were generated. The raw images were then  
117 reconstructed using the same methods from the previous section with the ORBIT toolbox.

118

## 119 Results

### 120 Radioluminescence images of single vs. double scintillator

121 As expected, experimental results demonstrate that the double scintillator configuration yields  
122 significantly higher radioactive decay count. RLM images acquired with the two configurations  
123 are shown in Figure 2a and 2b, respectively. The figures are shown in color using the same  
124 intensity scale, where red represents higher radioactive decay counts measured at each pixel.  
125 Also, the double scintillator configuration can detect radioactivity from cells that are otherwise  
126 undetectable using only one scintillator (highlighted circles in Figs 2c and 2d). It should be noted  
127 that the radioactive decay counts of the double scintillator case were adjusted to correct for the

128 half-life of  $^{18}\text{F}$  ( $\tau_{1/2} \sim 110$  minutes). Since the double scintillator image was acquired 21 minutes  
129 after the single scintillator image, the displayed count values were increased by 14%.

130

131 **Fig 2. RLM images of [ $^{18}\text{F}$ ]FDG uptake by MDA-MB-231 cells.** Raw RLM data acquired with  
132 (a) single scintillator and (b) double scintillator configuration. Composite image of  
133 radioluminescence and brightfield image of (c) single scintillator and (d) double scintillator. Red  
134 circles represent cells that are detectable with double scintillator only. Scale bar, 200  $\mu\text{m}$ .

135

## 136 Sensitivity comparison

137 The number of radioactive decay counts detected for each cell was estimated by drawing a  
138 circular region of interest (ROI; diameter, 90  $\mu\text{m}$ ) around individual cells ( $N = 66$ ) and summing  
139 the number of decay counts within each ROI. Each ROI measurement was then corrected by  
140 subtracting a background signal, which was obtained by averaging the radioactive decay counts  
141 detected in empty areas devoid of cells ( $N = 66$  ROIs).

142 The number of decay events measured in a single cell, defined as  $D$ , is related to the number of  
143 [ $^{18}\text{F}$ ]FDG molecules  $N_0$  within that cell at a reference time point. The relation can be expressed  
144 by,

$$D = SYN_0 \left( 1 - \exp \left( - \frac{\ln 2}{\tau_{1/2}} t \right) \right) \quad (1)$$

145 where  $S$  is the detection sensitivity of the RLM system,  $Y$  is the radioactive yield for particulate  
146 radiation (0.97 for  $^{18}\text{F}$ ),  $\tau_{1/2}$  is the half-life (~110 minutes for [ $^{18}\text{F}$ ]FDG), and  $t$  is the elapsed time.  
147 The sensitivity increase can thus be expressed in terms of the ratio,

$$\frac{S_{\text{double}}}{S_{\text{single}}} = \frac{D_{\text{double}} \cdot \exp\left(-\frac{\ln 2}{\tau_{1/2}} \Delta t\right)}{D_{\text{single}}} \quad (2)$$

148 where  $\Delta t = t_{\text{double}} - t_{\text{single}}$  is the time delay between the two measurements. The exponent  
149 term represents the decay correction due to time delay between the two experiments (and is equal  
150 to 1.14 for  $\Delta t = 21$  min). This allows us to assume that the two measurements are  
151 simultaneously performed on the same ROI. The increase in sensitivity was computed both for  
152 background ROIs and ROIs containing single cells. For background signals (ROIs devoid of  
153 cells), we individually quantified the radioluminescence signals (Fig 3a). While the data scatter  
154 is relatively large ( $r^2 > 0.69$ ), results demonstrate that the double scintillator configuration is  
155 indeed more sensitive than the single scintillator by a factor of 2. The average uptake values also  
156 show a two-fold increase in sensitivity,  $73 \pm 34$  counts/ROI (mean  $\pm$  one standard deviation) and  
157  $37 \pm 14$  counts/ROI for double and single scintillator, respectively.

158 Cell ROI are shown in Fig 3b for single and double scintillator configurations. As expected,  
159 [ $^{18}\text{F}$ ]FDG uptake demonstrated a heterogeneous behavior, with some cells taking up the  
160 radiotracer 3 – 4 times more than other cells. Furthermore, the measured average cell uptake was  
161 increased by two-fold when the second scintillator was added. The average uptake values were  
162  $407 \pm 156$  counts/cell for the double scintillator configuration and  $200 \pm 90$  counts/cell for the  
163 single scintillator case. Linear regression (dotted red line) of the two datasets found a linear  
164 relationship between the two datasets,  $y = 1.59x + 87.86$  ( $r^2 > 0.83$ ).



165

166 **Fig 3. Graphs representing single vs. double scintillator results.** Scatter plot of decay counts  
167 detected in 90  $\mu\text{m}$  ROI ( $N = 66$ ) for (a) background devoid of cells and (b) areas containing  
168 single cells. The solid blue line and dotted red lines represent the linear regression fit.

169

## 170 Spatial Resolution

171 The spatial resolution of the single and dual scintillator cases was quantitatively assessed by  
172 drawing a line profile across two radioactive cells (Fig 4a). The profile was normalized  
173 according to the maximum count values for both configurations (Fig 4b). Results clearly show  
174 two peaks separated by a valley, which correspond to two cells with [ $^{18}\text{F}$ ]FDG uptake along the  
175 line profile. Furthermore, no qualitative discrepancies in peak, valley, and background values can  
176 be observed between the two configurations. This simple comparison suggests that the sensitivity  
177 of RLM can be increased without significant degradation in spatial resolution.

178

179 **Fig 4. Radioactive decay profile of two closely positioned cells.** (a) A profile is drawn between  
180 two radioactive cells in the radioluminescence image. The image is represented in grayscale for  
181 presentation. Scale bar 200  $\mu\text{m}$ . (b) Graph of decay count profiles comparing radioluminescence  
182 image captured with single scintillator and double scintillator. Each plot is normalized by their  
183 respective maximum count values.

184

185 To further assess the effects on spatial resolution, a Monte Carlo simulation of the system was  
186 implemented using the GEANT4 package. A single  $^{18}\text{F}$  point source (1 Bq) was simulated for  
187 both configurations. The point-spread function measured by using the single and double  
188 scintillator configuration is shown in Figs 5a and 5b, respectively. The simulation results agree  
189 well with the experimental results – the double scintillator is more sensitive than the single  
190 scintillator system by a factor of two. It can be seen from the simulation, however, that the single  
191 scintillator system provides slightly higher spatial resolution than the double scintillator system.  
192 Using a circularly symmetric 2-D Gaussian curve fit, we estimate the FWHM of both systems  
193 and find that the single-scintillator system achieves a spatial resolution of 44  $\mu\text{m}$ , compared with  
194 53  $\mu\text{m}$  for the double-scintillator system.

195  
196 **Fig 5. Monte Carlo simulation results of a single radioactive point source.** Simulated RLM  
197 image of point source and corresponding 2D Gaussian fits with the (a, c) single and (b, d) double  
198 scintillator, respectively. Scale bar 200  $\mu\text{m}$ .

199

## 200 Discussion

201 The main finding of this study is that the double scintillator configuration increases the detection  
202 sensitivity by a factor of two compared to the single scintillator case. While there are clear  
203 advantages of using the double scintillator configuration over a single scintillator, a few  
204 considerations must be made. The first is the depth of field of the microscope, which must be  
205 large enough to accommodate both scintillators. The depth of field  $d_{LLM}$  of a microscope is,

$$d_{LLM} = \frac{n \cdot \lambda}{NA^2} + \frac{n \cdot b \cdot e}{M \cdot NA}, \quad (3)$$

206 where  $\lambda = 475$  nm is the emission peak of the scintillation light,  $n$  is the refractive index of the  
207 medium,  $NA$  is the numerical aperture of the objective lens,  $e$  is the pixel size,  $b$  is the binning  
208 number, and  $M$  is the effective magnification. As explained in a previous publication [15], the  
209 low-light microscope equipped with a 20× Nikon CFI Plan Apochromat  $\lambda$  has the following  
210 characteristics:  $M_{effective} = 3.6$ ,  $n = 1$ , and  $NA = 0.75$ . Considering the parameters of the EMCCD  
211 camera (pixel size of  $16 \mu\text{m} \times 16 \mu\text{m}$  and binning of  $4 \times 4$ ),  $d_{LLM}$  is estimated to be  $\sim 24.5 \mu\text{m}$ .  
212 Assuming that the distance between the bottom and top scintillator is  $\sim 10 \mu\text{m}$  [19], the depth of  
213 focus is sufficiently large to simultaneously focus on top and bottom edges of the scintillators.  
214 However, this is not true for all objective magnifications. For instance, a 40×/1.3 NA oil lens  
215 may not be compatible with the double-scintillator configuration. While  $M_{effective}$  will increase to  
216 7.2,  $d_{LLM}$  will be reduced by half or  $\sim 12.3 \mu\text{m}$ . This depth of field may not be enough to  
217 simultaneously capture the radioluminescence signals from both scintillators.

218 It should be pointed out that there is [ $^{18}\text{F}$ ]FDG efflux from the live cells, a well-known  
219 phenomenon of the glucose analog radiotracer [20,21]. Since the double scintillator image was  
220 captured 21 minutes after the single scintillator configuration, [ $^{18}\text{F}$ ]FDG efflux can be visualized  
221 by directly comparing the two RLM images. The pixel values of the double scintillator image  
222 were divided by two to match the single scintillator sensitivity, and the image was then  
223 subtracted by the single scintillator image. The resulting difference image is shown as Fig 6. In  
224 the figure, a significant number of radiolabeled cells with decreased activity are observed (shown  
225 in blue). On the other hand, there is a relative increase in radioactivity at the immediate vicinity  
226 of the cells. This is a clear indication that biological [ $^{18}\text{F}$ ]FDG efflux occurred between the two

227 measurements, which also explains why the linear regression coefficient was less than  $\times 2$  in  
228 Figure 3b ( $y = 1.59x + 87.86$ ).

229

230 **Fig 6. Differential RLM image comparing double and single scintillator configurations.** The  
231 decay-corrected double scintillator image was divided in half, followed by subtracting the single  
232 scintillator result. The black circles are ROIs around single cells.

233

234 Another confounding factor is that the double scintillator configuration may have increased  
235 signal contamination due to stray gamma rays, which may cause scintillation far away from the  
236 cell of origin. This may degrade the quality of radioluminescence images, particularly in areas of  
237 high cell density. Further studies regarding the effect of radiation contamination from closely  
238 positioned cells is required.

239

## 240 Conclusion

241 We demonstrated a method to double the sensitivity of radioluminescence microscopy or RLM.  
242 While RLM provides quantitative information on the biological response of tissues and cells to  
243 radiopharmaceuticals, the technique is limited by slow data acquisition time. To resolve this  
244 issue, we sandwiched the radiolabeled cells between two parallel scintillators. Results show that  
245 the sensitivity increased by a factor of two compared to the original single scintillator method,  
246 thus effectively reducing the acquisition time by half. While simulation results show that the  
247 double scintillator geometry has slightly lower spatial resolution, this effect was not noticeable

248 during experimental cell imaging. Moreover, we were able to visualize radiotracer efflux around  
249 the cells, suggesting a new application that our technique can be used to simultaneously quantify  
250 radiotracer uptake and efflux. In conclusion, the significant reduction in image acquisition time  
251 will increase the experimental throughput and enabling pharmacokinetic analysis of short-lived  
252 clinical radiotracers. In addition, the dual scintillator configuration may be a suitable candidate  
253 for miniaturized radiobioassay devices, which is an emerging technology that enables evaluation  
254 of biological responses to novel radiotracers with minimal volume requirements [22].

255

## 256 References

- 257 1. Din AS, Kalapparambath TP, Tomas MB, Palestro CJ, Love C. Radionuclide Bone  
258 Imaging: An Illustrative Review. *RadioGraphics*. 2007; doi:10.1148/rg.232025103
- 259 2. Bruehlmeier M, Roelcke U, Schubiger PA, Ametamey SM. Assessment of hypoxia and  
260 perfusion in human brain tumors using PET with 18F-fluoromisonidazole and 15O-H<sub>2</sub>O. *J*  
261 *Nucl Med*. 2004;
- 262 3. Dobrucki LW, Sinusas AJ. PET and SPECT in cardiovascular molecular imaging. *Nature*  
263 *Reviews Cardiology*. 2010. doi:10.1038/nrcardio.2009.201
- 264 4. Zhu L, Ploessl K, Kung HF. PET/SPECT imaging agents for neurodegenerative diseases.  
265 *Chemical Society Reviews*. 2014. doi:10.1039/c3cs60430f
- 266 5. Gambhir SS. Molecular imaging of cancer with positron emission tomography. *Nat Rev*  
267 *Cancer*. 2002;2: 683–693.

- 268 6. Bar-Shalom R, Yefremov N, Frenkel A, Keidar Z, Israel O, Guralnik L, et al. Clinical  
269 performance of PET/CT in evaluation of cancer: Additional value for diagnostic imaging  
270 and patient management. *J Nucl Med.* 2003;
- 271 7. Kwee TC, Kwee RM. Combined FDG-PET/CT for the detection of unknown primary  
272 tumors: Systematic review and meta-analysis. *European Radiology.* 2009.  
273 doi:10.1007/s00330-008-1194-4
- 274 8. Young H, Baum R, Cremerius U, Herholz K, Hoekstra O, Lammertsma AA, et al.  
275 Measurement of clinical and subclinical tumour response using [18F]- fluorodeoxyglucose  
276 and positron emission tomography: Review and 1999 EORTC recommendations. *Eur J*  
277 *Cancer.* 1999; doi:10.1016/S0959-8049(99)00229-4
- 278 9. Puncher MRB, Blower PJ. Radionuclide targeting and dosimetry at the microscopic level:  
279 the role of microautoradiography. *Eur J Nucl Med.* 1994;21: 1347–1365.
- 280 10. Nielsen JL, Nielsen PH. Advances in microscopy: Microautoradiography of single cells.  
281 *Methods in Enzymology.* 2005. doi:10.1016/S0076-6879(05)97014-6
- 282 11. Kiru L, Kim TJ, Shen B, Chin FT, Prax G. Single-Cell Imaging Using  
283 Radioluminescence Microscopy Reveals Unexpected Binding Target for [18F]HFB. *Mol*  
284 *Imaging Biol.* 2017; doi:10.1007/s11307-017-1144-0
- 285 12. Sengupta D, Prax G. Single-cell characterization of FLT uptake with radioluminescence  
286 microscopy. *J Nucl Med.* 2016; jnumed. 115.167734.
- 287 13. Turkcan S, Kiru L, Naczynski DJ, Sasportas LS, Prax G. Lactic acid accumulation in the  
288 tumor microenvironment suppresses 18 F-FDG uptake. *Cancer Res.* 2019;

289 doi:10.1158/0008-5472.CAN-17-0492

290 14. Kim TJ, Türkcan S, Prax G. Modular low-light microscope for imaging cellular  
291 bioluminescence and radioluminescence. *Nat Protoc.* 2017;12: 1055–1076.

292 15. Kim TJ, Tuerkcan S, Ceballos A, Prax G. Modular platform for low-light microscopy.  
293 *Biomed Opt Express.* 2015;6: 4585–4598.

294 16. Prax G, Chen K, Sun C, Axente M, Sasportas L, Carpenter C, et al. High-Resolution  
295 Radioluminescence Microscopy of 18F-FDG Uptake by Reconstructing the  $\beta$ -Ionization  
296 Track. *J Nucl Med.* 2013;54: 1841–1846.

297 17. Klein JS, Sun C, Prax G. Radioluminescence in biomedicine: Physics, applications, and  
298 models. *Physics in Medicine and Biology.* 2019. doi:10.1088/1361-6560/aaf4de

299 18. Wang Q, Sengupta D, Kim TJ, Prax G. In silico optimization of radioluminescence  
300 microscopy. *J Biophotonics.* 2018; doi:10.1002/jbio.201700138

301 19. Wang Q, Sengupta D, Kim TJ, Prax G. Performance evaluation of 18 F  
302 radioluminescence microscopy using computational simulation. *Med Phys.* 2017;  
303 doi:10.1002/mp.12198

304 20. Adonai N, Nguyen KN, Walsh J, Iyer M, Toyokuni T, Phelps ME, et al. Ex vivo cell  
305 labeling with  $^{64}\text{Cu}$ -pyruvaldehyde-bis(N4-methylthiosemicarbazone) for imaging cell  
306 trafficking in mice with positron-emission tomography. *Proc Natl Acad Sci.* 2002;  
307 doi:10.1073/pnas.052709599

308 21. Botti C, Negri DRM, Seregini E, Ramakrishna V, Arienti F, Maffioli L, et al. Comparison  
309 of three different methods for radiolabelling human activated T lymphocytes. *Eur J Nucl*

310 Med. 1997; doi:10.1007/s002590050081

311 22. Liu Z, Lan X. Microfluidic radiobioassays: a radiometric detection tool for understanding  
312 cellular physiology and pharmacokinetics. Lab Chip. 2019; doi:10.1039/c9lc00159j

313



(a)

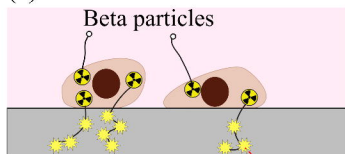

(b)

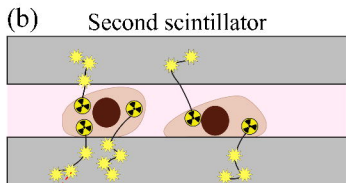

Scintillation flashes

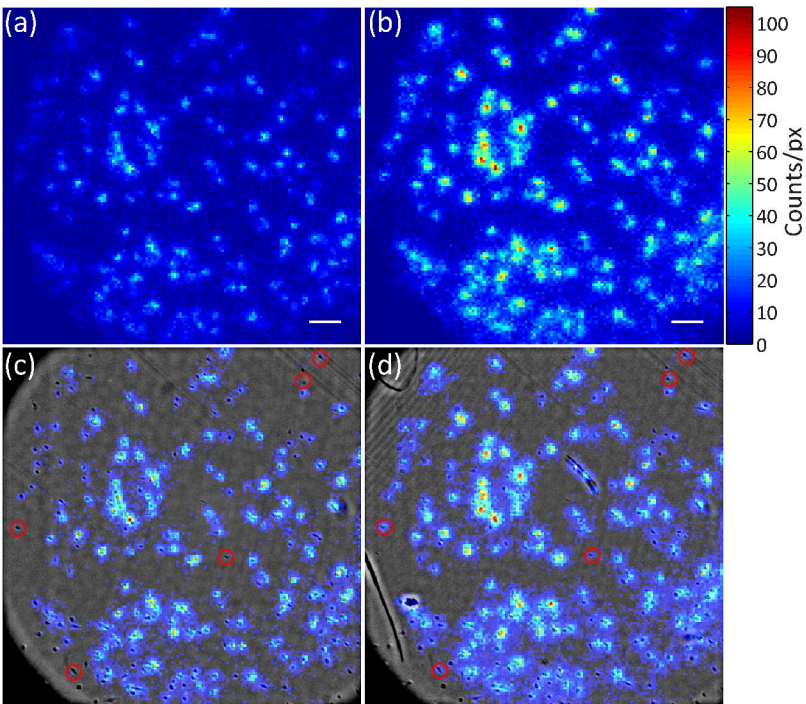

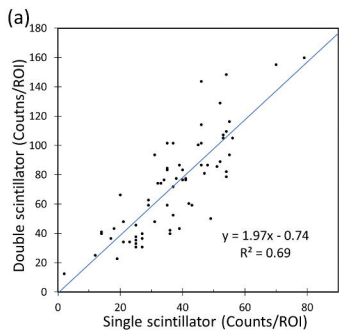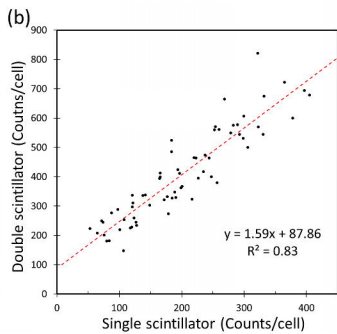

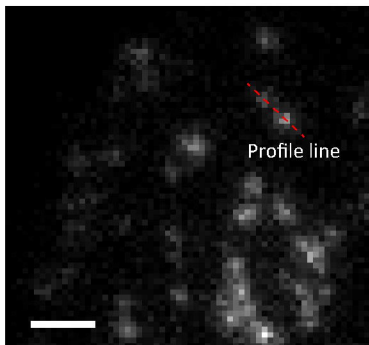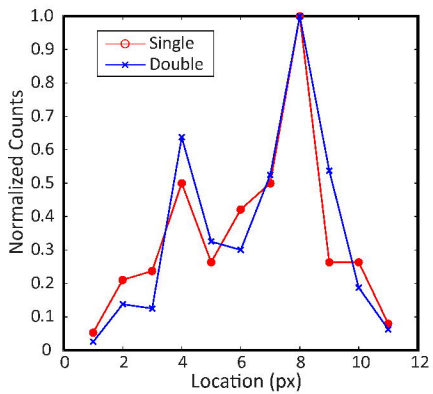

(a) Single scintillator

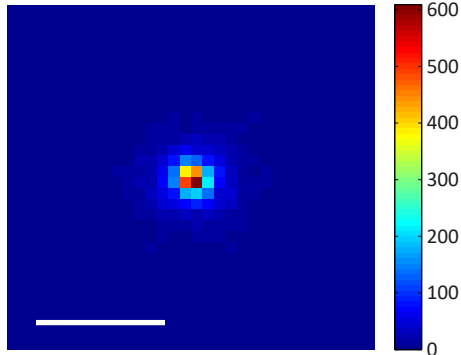

(b) Double scintillator

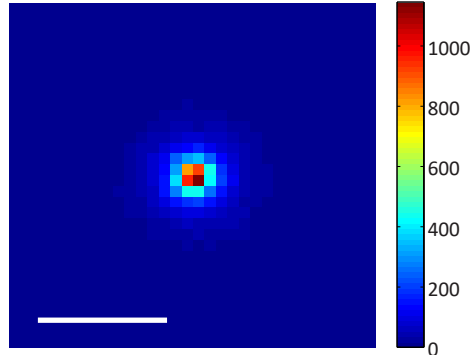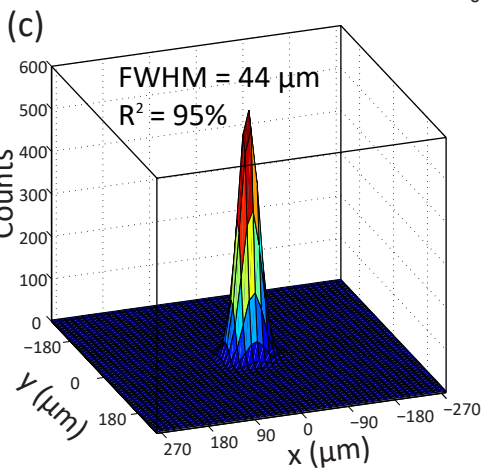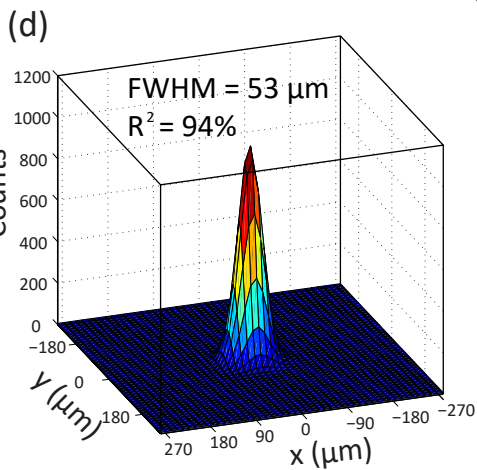

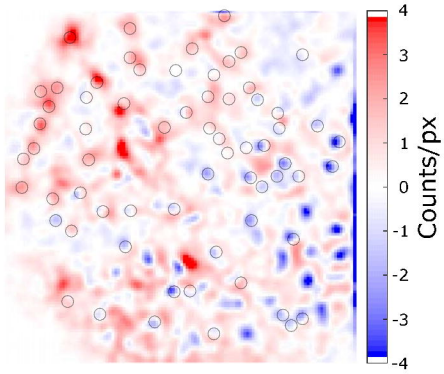

Source: http://biorxiv.org/content/10.1101/725994v2.full.pdf
